# Supplementary material for: Sediment Barriers’ Performance in the Laboratory: Evaluation of Clogging and Filtration Characteristics in Geotextiles Subjected to Discharge Cycles
Source: MDPI journal article supplement (doi:10.3390/w16010107), 2023-12-27
Supplement: s1 [file s1]

Archive with 1 entries (1 files):
- water-2752627-supplementary.pdf
