# Supplementary material for: Sediment Barriers’ Performance in the Laboratory: Evaluation of Clogging and Filtration Characteristics in Geotextiles Subjected to Discharge Cycles
Source: MDPI journal article supplement (doi:10.3390/w16010107), 2023-12-27
Supplement: s1 [file s1 › water-2752627-supplementary.pdf]

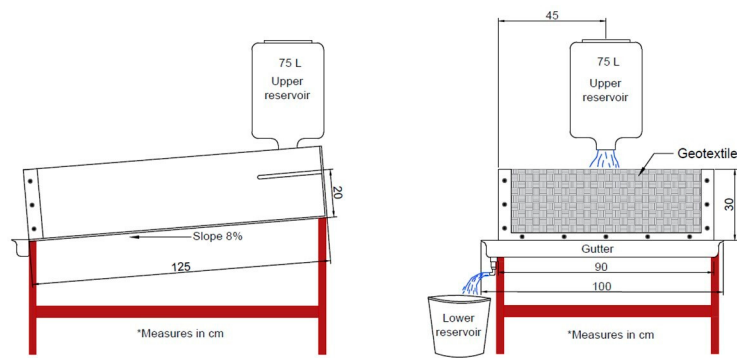

Figure S1: Scheme of the apparatus used in the study, according to ASTM D5141-11 [26].

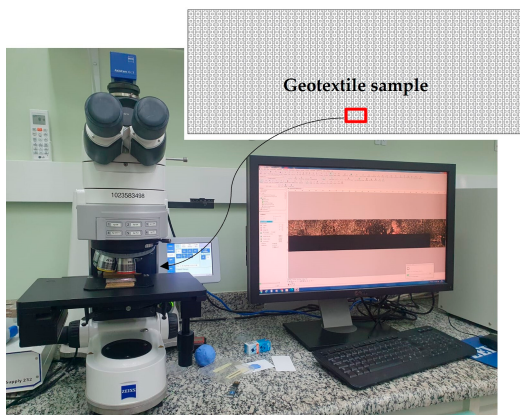

Figure S2: Highlighted geotextile area that was used in the analysis with the optical microscope.
